# Supplementary material for: Fungicidal Activity of a Safe 1,3,4-Oxadiazole Derivative Against Candida albicans
Source: MDPI journal article supplement (doi:10.3390/pathogens10030314), 2021-03-07
Supplement: s1 [file s1]

**Supplementary Material Table S2.** General appearance and behavioral observations of male Balb/c mice exposed to high LMM6 concentration in the acute toxicity study.

| Observations        | Healthy |            | IP control |            | IV control |            | IP LMM6 |            | IV LMM6 |            |
|---------------------|---------|------------|------------|------------|------------|------------|---------|------------|---------|------------|
|                     | 0'-24h  | 2°-14° dia | 0'-24h     | 2°-14° dia | 0'-24h     | 2°-14° dia | 0'-24h  | 2°-14° dia | 0'-24h  | 2°-14° dia |
| General appearance  | N       | N          | N          | N          | N          | N          | N       | N          | N       | N          |
| Motor coordination  | N       | N          | NC         | NC         | NC         | NC         | NC      | NC         | NC      | NC         |
| Muscle tone         | N       | N          | NC         | NC         | NC         | NC         | NC      | NC         | NC      | NC         |
| Reflexes            | N       | N          | NC         | NC         | NC         | NC         | NC      | NC         | NC      | NC         |
| Lethargy            | A       | A          | P          | A          | P          | A          | P       | A          | P       | A          |
| Tremors             | A       | A          | A          | A          | A          | A          | A       | A          | A       | A          |
| Convulsions         | A       | A          | A          | A          | A          | A          | A       | A          | A       | A          |
| Sedation            | A       | A          | A          | A          | A          | A          | A       | A          | A       | A          |
| Hypnosis            | A       | A          | A          | A          | A          | A          | A       | A          | A       | A          |
| Anesthesia          | A       | A          | A          | A          | A          | A          | A       | A          | A       | A          |
| Urination           | N       | N          | NC         | NC         | NC         | NC         | NC      | NC         | NC      | NC         |
| Defecation          | N       | N          | NC         | NC         | NC         | NC         | NC      | NC         | NC      | NC         |
| Piloerection        | A       | A          | P          | A          | P          | A          | P       | A          | P       | A          |
| Rate of respiration | N       | N          | NC         | NC         | NC         | NC         | NC      | NC         | NC      | NC         |
| Heart rate          | ↑       | N          | ↑          | N          | ↑          | N          | ↑       | N          | ↑       | N          |
| Death               | A       | A          | A          | A          | A          | A          | A       | A          | A       | A          |

Behavioral parameters were observed at times 0, 15, 30, 60, 120, 240 minutes and daily following single dose administration of LMM6. Abbreviations; N: normal; NC: Not changed; P: present; A: ausent; ↑ : Increased; Healthy: normal mice; IP control: treated intraperitoneally with the vehicle; IV control: treated intravenous with the vehicle; IP LMM6: treated with 50mg/kg of LMM6 intraperitoneally; IV LMM6: treated with 25 mg/kg of LMM6 intravenous.
