# Supplementary material for: Fungicidal Activity of a Safe 1,3,4-Oxadiazole Derivative Against Candida albicans
Source: MDPI journal article supplement (doi:10.3390/pathogens10030314), 2021-03-07
Supplement: s1 [file s1]

**Supplementary Material Table S1.** Specimen/source of 30 clinical isolates of *C. albicans* and antifungal susceptibility profile to LMM6 and conventional antifungal drugs.

| Clinial isolates |                    | Specimen/<br>Source | MIC µg/mL    |            |             |              |      |
|------------------|--------------------|---------------------|--------------|------------|-------------|--------------|------|
|                  |                    |                     | Amphoterin B | Caspofugin | Fluconazole | Itraconazole | LMM6 |
| 1                | <b>UrHUMCa2</b>    | Urine               | 0.25         | 0.125      | 0.125       | 0.125        | 8    |
| 2                | <b>UrHUMCa3</b>    | Urine               | 0.125        | 0.125      | 0.06        | 0.5          | 8    |
| 3                | <b>SangHUMCa7</b>  | Blood               | 0.25         | 0.125      | 0.125       | 0.25         | 8    |
| 4                | <b>UrHUMCa13</b>   | Urine               | 0.06         | 0.03       | >64         | >16          | 4    |
| 5                | <b>UrHUMCa15</b>   | Urine               | 0.03         | 0.25       | 0.125       | 0.06         | 8    |
| 6                | <b>UrHUMCa18</b>   | Urine               | 0.125        | 0.25       | 0.125       | 0.06         | 16   |
| 7                | <b>SangHUMCa25</b> | Sangue              | 0.06         | 0.125      | 0.125       | 0.03         | 8    |
| 8                | <b>UrHUMCa27</b>   | Urine               | 0.125        | 0.125      | 0.125       | 0.06         | 8    |
| 9                | <b>SangHUMCa28</b> | Sangue              | 0.03         | 0.125      | 0.125       | 0.06         | 8    |
| 10               | <b>LasHUMCa29</b>  | Ascitic fluid       | 0.03         | 0.03       | 0.125       | 0.06         | 8    |
| 11               | <b>UrHUMCa30</b>   | Urine               | 0.5          | 0.25       | 0.25        | 0.25         | 32   |
| 12               | <b>UrHUMCa33</b>   | Urine               | 0.25         | 0.25       | 0.25        | 0.125        | 16   |
| 13               | <b>SangHUMCa35</b> | Sangue              | 0.25         | 0.25       | 0.25        | 0.125        | 16   |
| 14               | <b>LABHUMCa36</b>  | Abdominal<br>fluid  | 0.03         | 0.06       | 0.125       | 0.06         | 8    |
| 15               | <b>UrHUMCa38</b>   | Urine               | 0.06         | 0.03       | 0.125       | 0.06         | 8    |
| 16               | <b>UrHUMCa40</b>   | Urine               | 0.03         | 0.125      | 0.125       | 0.06         | 8    |
| 17               | <b>UrHUMCa45</b>   | Urine               | 0.06         | 0.125      | 0.25        | 0.125        | 8    |
| 18               | <b>UrHUMCa46</b>   | Urine               | 0.125        | 0.125      | 0.25        | 0.06         | 16   |
| 19               | <b>UrHUMCa48</b>   | Urine               | 0.25         | 0.125      | 0.25        | 0.125        | 32   |
| 20               | <b>UrHUMCa49</b>   | Urine               | 0.125        | 0.125      | 0.125       | 0.06         | 16   |
| 21               | <b>UrHUMCa56</b>   | Urine               | 0.125        | 0.25       | 0.25        | 0.125        | 16   |
| 22               | <b>PtHUMCa57</b>   | Catheter tip        | 0.125        | 0.06       | 0.25        | 0.125        | 16   |
| 23               | <b>UrHUMCa59</b>   | Urine               | 0.125        | 0.125      | 0.25        | 0.125        | 16   |
| 24               | <b>UrHUMCa60</b>   | Urine               | 0.25         | 0.125      | 0.25        | 0.06         | 16   |
| 25               | <b>UrHUMCa61</b>   | Urine               | 0.125        | 0.125      | 0.5         | 0.125        | 8    |
| 26               | <b>PtHUMCa62</b>   | Catheter tip        | 0.125        | 0.125      | 0.5         | 0.25         | 32   |
| 27               | <b>UrHUMCa63</b>   | Urine               | 0.125        | 0.125      | 0.25        | 0.06         | 16   |
| 28               | <b>UrHUMCa70</b>   | Urine               | 0.125        | 0.125      | 0.25        | 0.125        | 16   |
| 29               | <b>LABHUMC75</b>   | Abdominal<br>fluid  | 0.25         | 0.06       | 0.25        | 0.25         | 32   |
| 30               | <b>UrHUMCa76</b>   | Urine               | 0.25         | 0.06       | 0.125       | 0.25         | 16   |

Abbreviations; MIC: minimal inhibitory concentration.
