# Supplementary material for: Fungicidal Activity of a Safe 1,3,4-Oxadiazole Derivative Against Candida albicans
Source: MDPI journal article supplement (doi:10.3390/pathogens10030314), 2021-03-07
Supplement: s1 [file s1]

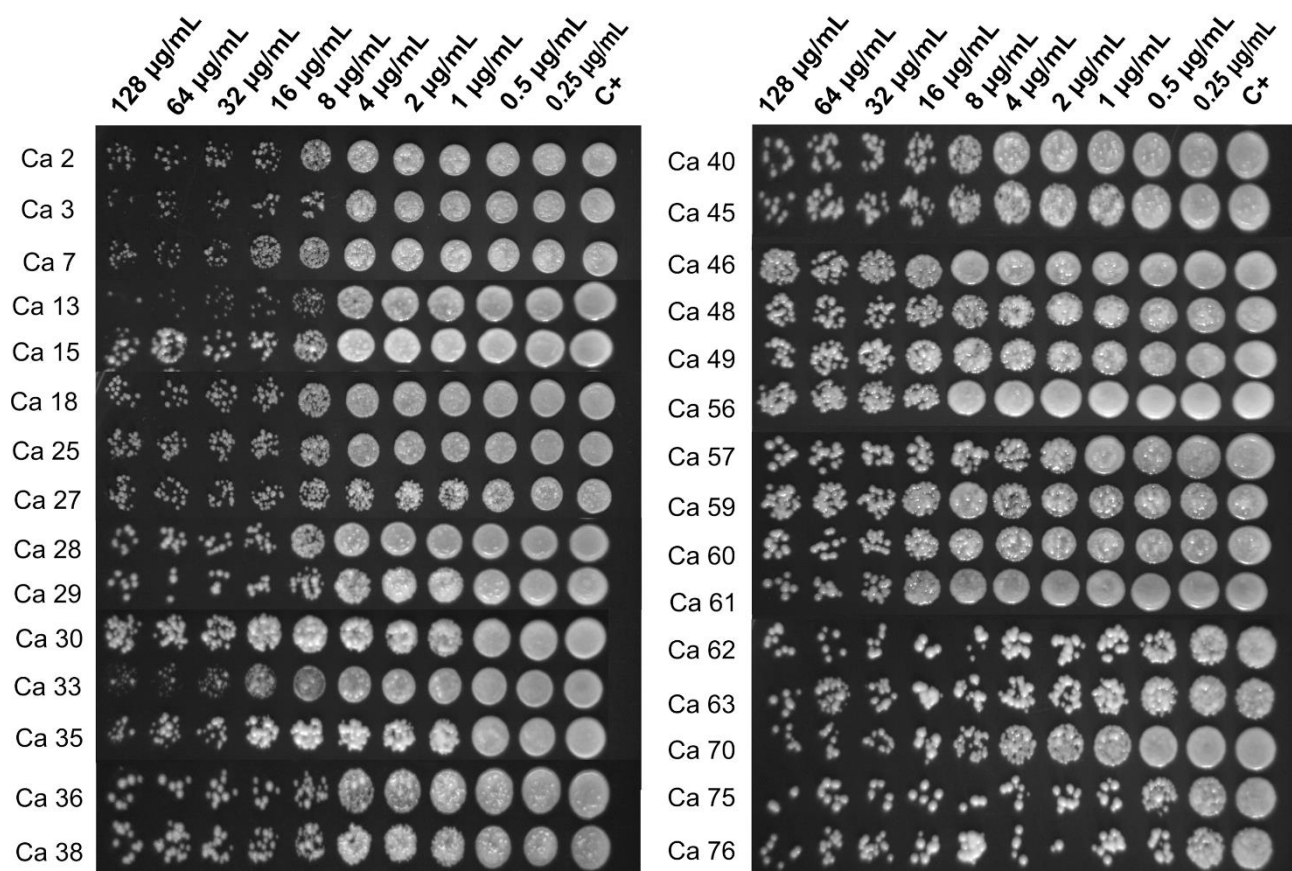

**Supplementary Material Figure S1. Minimum fungicidal concentration of LMM6 for 30 clinical isolates of *C. albicans*.** After exposure of yeast to increased LMM6 concentrations (0.25-128 µg/mL) for 24 hours, aliquots of 3µL of the solution were transferred to SDA plates and incubated at 35°C. Representative photograph of three independent experiments.
