# Supplementary material for: Fungicidal Activity of a Safe 1,3,4-Oxadiazole Derivative Against Candida albicans
Source: MDPI journal article supplement (doi:10.3390/pathogens10030314), 2021-03-07
Supplement: s1 [file s1]

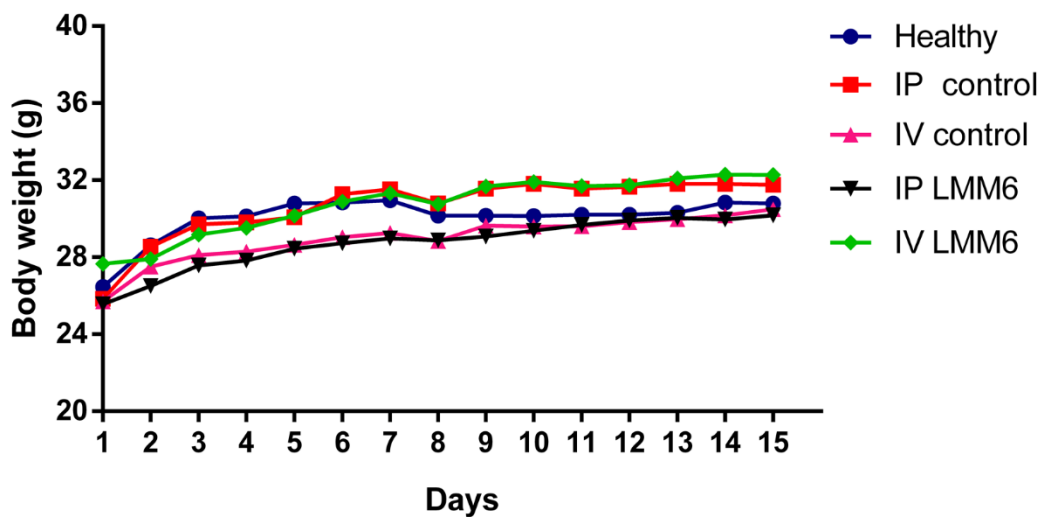

**Supplementary Material Figure S2. Comparative body weight changes in male Balb/c mice during acute toxicity experimentation.** The body weight of mice was weighed daily for 14 days following single dose administration of LMM6. Healthy: normal mice; IP control: treated intraperitoneally with the vehicle; IV control: treated intravenous with the vehicle; IP LMM6: treated with 50mg/kg of LMM6 intraperitoneally; IV LMM6: treated with 25 mg/kg of LMM6 intravenous.
