# Supplementary material for: Fungicidal Activity of a Safe 1,3,4-Oxadiazole Derivative Against Candida albicans
Source: Pathogens. 2021 Mar 7;10(3):314. doi: 10.3390/pathogens10030314 (PMC8001722; doi:10.3390/pathogens10030314)
Supplement: Supplementary file 1 [file pathogens-10-00314-s001.zip]

Archive with 4 entries (4 files):
- Supplementary Material pdf/Supplementary Material Figure S1.pdf
- Supplementary Material pdf/Supplementary Material Figure S2.pdf
- Supplementary Material pdf/Supplementary Material Table S1.pdf
- Supplementary Material pdf/Supplementary Material Table S2.pdf
